# Supplementary material
Source: publisher site journal article supplement (https://www.dovepress.com/article/320096)
Supplement: Supplementary file 1 [file get_supplementary_file.php]

Supplementary Material

Lung inflammatory response to environmental dust exposure in mice suggests a link to regional respiratory disease risk

Burr and Velazquez, et al.


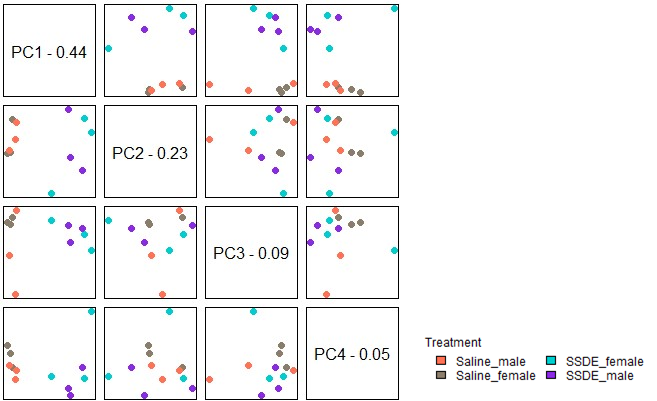


**Supplemental Figure 1.**Principal component analysis of overall gene expression data showing no clustering between the males and females. PCA analysis was performed by Nanostring advanced analysis module. N=3 females and n=3 males per treatment group.
